# Supplementary material for: Procurement Biopsy Findings Versus Kidney Donor Risk Index for Predicting Renal Allograft Survival
Source: PubMed Central journal article supplement — Transplant Direct. 2018 Jul 16;4(8):e373. doi: 10.1097/TXD.0000000000000816 (PMC6092182; doi:10.1097/txd.0000000000000816), 2018-07-16
Supplement: txd-4-e373-s001.pdf [file txd-4-e373-s001.pdf]

## SUPPLEMENTAL DIGITAL CONTENT

**Table S1a:** Donor characteristics by biopsy performed (excluded vs. included)

|                                              |             | All<br>(N=1664)   | No Biopsy<br>(N=774) | Biopsy<br>performed<br>(N=890) | P      |
|----------------------------------------------|-------------|-------------------|----------------------|--------------------------------|--------|
| Age, years                                   |             | 46 [29, 55]       | 32 [23, 46]          | 53 [44, 61]                    | <0.001 |
| Male                                         |             | 994 (60%)         | 494 (64%)            | 500 (56%)                      | 0.002  |
| Black race                                   |             | 267 (16%)         | 110 (14%)            | 157 (18%)                      | 0.057  |
| Hispanic                                     |             | 203 (12%)         | 87 (11%)             | 116 (13%)                      | 0.265  |
| Body mass index, Kg/m <sup>2</sup>           |             | 27 [24, 32]       | 26 [23, 30]          | 28 [24, 34]                    | <0.001 |
| Hypertension                                 |             | 597 (36%)         | 100 (13%)            | 497 (56%)                      | <0.001 |
| Diabetes                                     |             | 139 (8%)          | 18 (2%)              | 121 (14%)                      | <0.001 |
| Cause of death                               | Head Trauma | 444 (28%)         | 291 (41%)            | 153 (17%)                      | <0.001 |
|                                              | Anoxia      | 530 (33%)         | 246 (35%)            | 284 (32%)                      |        |
|                                              | Stroke      | 587 (37%)         | 161 (23%)            | 426 (49%)                      |        |
|                                              | Other       | 23 (1%)           | 10 (1%)              | 13 (1%)                        |        |
| Hepatitis C seropositive                     |             | 70 (4%)           | 41 (5%)              | 29 (3%)                        | 0.039  |
| Expanded criteria donor                      |             | 429 (26%)         | 33 (4%)              | 396 (44%)                      | <0.001 |
| Donation after cardiac death                 |             | 256 (15%)         | 125 (16%)            | 131 (15%)                      | 0.42   |
| KDRI                                         |             | 1.28 [1.01, 1.65] | 1.04 [0.87, 1.24]    | 1.56 [1.28, 1.9]               | <0.001 |
| KDPI                                         |             | 54 [30, 77]       | 33 [15, 50]          | 73 [54, 88]                    | <0.001 |
| Terminal serum creatinine, mg/dL             |             | 1 [0.7, 1.4]      | 0.9 [0.7, 1.2]       | 1.1 [0.79, 1.6]                | <0.001 |
| Year of procurement                          | 2010        | 239 (18%)         | 138 (19%)            | 101 (17%)                      | 0.055  |
|                                              | 2011        | 425 (32%)         | 238 (33%)            | 187 (31%)                      |        |
|                                              | 2012        | 412 (31%)         | 232 (32%)            | 180 (30%)                      |        |
|                                              | 2013        | 253 (19%)         | 119 (16%)            | 134 (22%)                      |        |
| Participating organ procurement organization | A           | 79 (5%)           | 66 (9%)              | 13 (1%)                        | <0.001 |
|                                              | B           | 191 (11%)         | 57 (7%)              | 134 (15%)                      |        |
|                                              | C           | 280 (17%)         | 176 (23%)            | 104 (12%)                      |        |
|                                              | D           | 254 (15%)         | 32 (4%)              | 222 (25%)                      |        |
|                                              | E           | 860 (52%)         | 443 (57%)            | 417 (47%)                      |        |

Values are N (%) or median [interquartile range]. KDRI, kidney donor risk index; KDPI, kidney donor profile index.

**Table S1b:** Recipient, transplant and kidney characteristics by biopsy performed (excluded vs. included)

| Recipient and transplant characteristics |                    | All (N=2613)      | No Biopsy (N=1469) | Biopsy performed (N=1144) | P*     |
|------------------------------------------|--------------------|-------------------|--------------------|---------------------------|--------|
| Age, years                               |                    | 55 [45, 64]       | 51 [41, 61]        | 60 [50, 66]               | <0.001 |
| Male                                     |                    | 1595 (61%)        | 889 (61%)          | 706 (62%)                 | 0.534  |
| Black race                               |                    | 1021 (39%)        | 548 (37%)          | 473 (41%)                 | 0.036  |
| Hispanic                                 |                    | 294 (11%)         | 153 (10%)          | 141 (12%)                 | 0.125  |
| Body mass index, Kg/m <sup>2</sup>       |                    | 28 [24, 32]       | 27 [23, 31]        | 28 [25, 32]               | <0.001 |
| Cause of ESRD                            | Other or unknown   | 541 (21%)         | 331 (23%)          | 210 (18%)                 | <0.001 |
|                                          | Diabetes           | 786 (30%)         | 411 (28%)          | 375 (33%)                 |        |
|                                          | Hypertension       | 681 (26%)         | 358 (24%)          | 323 (28%)                 |        |
|                                          | Glomerulonephritis | 424 (16%)         | 256 (17%)          | 168 (15%)                 |        |
|                                          | Graft failure      | 181 (7%)          | 113 (8%)           | 68 (6%)                   |        |
| Duration of ESRD, months                 |                    | 42 [16, 66]       | 39 [14, 64]        | 47 [21, 68]               | <0.001 |
| Preemptive Transplant                    |                    | 293 (11%)         | 172 (12%)          | 121 (11%)                 | 0.363  |
| Kidney machine perfusion used            |                    | 1010 (39%)        | 279 (19%)          | 731 (64%)                 | <0.001 |
| Kidney cold ischemia time, hours         |                    | 14.1 [10.0, 19.2] | 12.3 [8.8, 17.0]   | 16.5 [12.1, 22.0]         | <0.001 |
| Human leukocyte antigen mismatch level   | 0                  | 163 (6%)          | 106 (7%)           | 57 (5%)                   | <0.001 |
|                                          | 1                  | 23 (1%)           | 13 (1%)            | 10 (1%)                   |        |
|                                          | 2                  | 86 (3%)           | 55 (4%)            | 31 (3%)                   |        |
|                                          | 3                  | 318 (12%)         | 190 (13%)          | 128 (11%)                 |        |
|                                          | 4                  | 686 (26%)         | 412 (28%)          | 274 (24%)                 |        |
|                                          | 5                  | 883 (34%)         | 452 (31%)          | 431 (38%)                 |        |
|                                          | 6                  | 447 (17%)         | 236 (16%)          | 211 (18%)                 |        |
| Panel reactive antibody                  | 0%                 | 1677 (64%)        | 878 (60%)          | 799 (70%)                 | <0.001 |
|                                          | 1-20%              | 183 (7%)          | 97 (7%)            | 86 (8%)                   |        |
|                                          | 21-80%             | 344 (13%)         | 202 (14%)          | 142 (12%)                 |        |
|                                          | >80%               | 409 (16%)         | 292 (20%)          | 117 (10%)                 |        |
| Delayed graft function                   |                    | 821 (31%)         | 363 (25%)          | 458 (40%)                 | <0.001 |
| 1-year eGFR, ml/min/1.73m <sup>2</sup>   |                    | 54 [40, 71]       | 61 [46, 77]        | 48 [35, 63]               | <0.001 |
| 3-year eGFR, ml/min/1.73m <sup>2</sup>   |                    | 52 [34, 70]       | 59 [41, 76]        | 46 [30, 61]               | <0.001 |
| Kidney characteristics                   |                    | All (N=3320)      | No Biopsy (N=1591) | Biopsy performed (N=1729) | P      |
| Glomerulosclerosis                       | GS <10%            | 1307 (39%)        |                    | 1307 (76%)                | NA     |
|                                          | GS 10%-20%         | 226 (7%)          |                    | 226 (13%)                 |        |
|                                          | GS >20%            | 196 (6%)          |                    | 196 (11%)                 |        |
| IFTA                                     | None (≤5%)         | 810 (24%)         |                    | 810 (47%)                 | NA     |
|                                          | Mild (6-25%)       | 815 (45%)         |                    | 815 (47%)                 |        |
|                                          | Moderate (26-50%)  | 99 (3%)           |                    | 99 (6%)                   |        |
|                                          | Severe (>50%)      | 5 (0%)            |                    | 5 (0%)                    |        |
| Kidney Leuven score                      |                    | 59 [49, 69]       |                    | 59 [49, 59]               | NA     |
| Kidney discarded                         |                    | 707 (21%)         | 122 (8%)           | 585 (34%)                 | <0.001 |

Values are N (%) or median [interquartile range]. ESRD, end-stage renal disease; IFTA, interstitial fibrosis/tubular atrophy; eGFR, estimated glomerular filtration rate; NA, not applicable.

**S2: Biopsy rates and percentages of substantial pathology in biopsy reports by OPO**

| <b>OPO</b>              | <b># of donors biopsied</b> | <b># of kidneys biopsied</b> | <b>Kidney GS &gt;20%</b> | <b>Kidney IFTA moderate-severe</b> |
|-------------------------|-----------------------------|------------------------------|--------------------------|------------------------------------|
| <b>A</b> (n=79 donors)  | 13 (16%)                    | 25                           | 2 (8%)                   | 4 (16%)                            |
| <b>C</b> (n=280 donors) | 104 (37%)                   | 202                          | 25 (12%)                 | 21 (10%)                           |
| <b>E</b> (n=860 donors) | 417 (48%)                   | 817                          | 106 (13%)                | 40 (5%)                            |
| <b>B</b> (n=191 donors) | 134 (70%)                   | 259                          | 44 (17%)                 | 32 (12%)                           |
| <b>D</b> (n=254 donors) | 222 (87%)                   | 426                          | 19 (4%)                  | 7 (2%)                             |

Values are N (%). OPO, organ procurement organization; GS, glomerulosclerosis; IFTA, interstitial fibrosis/tubular atrophy.

**Table S3:** Recipient, transplant and kidney characteristics by Leuven score median

| Recipient and transplant characteristics |                    | All (N=1144)     | Leuven Score ≤59 (N=694) | Leuven Score >59 (N=450) | P      |
|------------------------------------------|--------------------|------------------|--------------------------|--------------------------|--------|
| Age, years                               |                    | 60 [50, 66]      | 57 [47, 64]              | 63 [56, 69]              | <0.001 |
| Male                                     |                    | 706 (62%)        | 433 (62%)                | 273 (61%)                | 0.558  |
| Black race                               |                    | 473 (41%)        | 291 (38%)                | 182 (40%)                | 0.618  |
| Hispanic                                 |                    | 141 (12%)        | 75 (11%)                 | 66 (15%)                 | 0.052  |
| Body mass index, Kg/m <sup>2</sup>       |                    | 28 [25, 32]      | 28 [24, 32]              | 28 (25, 32]              | 0.103  |
| Cause of ESRD                            | Other or unknown   | 210 (18%)        | 143 (21%)                | 67 (15%)                 | <0.001 |
|                                          | Diabetes           | 375 (33%)        | 205 (30%)                | 170 (38%)                |        |
|                                          | Hypertension       | 323 (28%)        | 182 (26%)                | 141 (31%)                |        |
|                                          | Glomerulonephritis | 169 (15%)        | 116 (17%)                | 52 (12%)                 |        |
|                                          | Graft failure      | 68 (6%)          | 48 (7%)                  | 20 (4%)                  |        |
| Duration of ESRD, months                 |                    | 20 [0, 56]       | 33 [0, 62]               | 0 [0, 49]                | 0.007  |
| Preemptive Transplant                    |                    | 121 (11%)        | 75 (11%)                 | 46 (10%)                 | 0.753  |
| Kidney machine perfusion used            |                    | 731 (64%)        | 417 (60%)                | 314 (70%)                | <0.001 |
| Kidney cold ischemia time, hours         |                    | 16.5 [12.1, 22]  | 16.5 [12, 22]            | 16.5 [12.3, 21.5]        | 0.429  |
| Human leukocyte antigen mismatch level   | 0                  | 57 (5%)          | 39 (6%)                  | 18 (4%)                  | 0.563  |
|                                          | 1                  | 10 (1%)          | 6 (1%)                   | 4 (1%)                   |        |
|                                          | 2                  | 31 (3%)          | 21 (3%)                  | 10 (2%)                  |        |
|                                          | 3                  | 128 (11%)        | 83 (12%)                 | 45 (10%)                 |        |
|                                          | 4                  | 274 (24%)        | 176 (25%)                | 98 (22%)                 |        |
|                                          | 5                  | 431 (38%)        | 243 (35%)                | 188 (42%)                |        |
|                                          | 6                  | 211 (18%)        | 125 (18%)                | 86 (19%)                 |        |
| Panel reactive antibody                  | 0%                 | 799 (70%)        | 468 (67%)                | 331 (74%)                | 0.001  |
|                                          | 1-20%              | 86 (8%)          | 50 (7%)                  | 36 (8%)                  |        |
|                                          | 21-80%             | 142 (12%)        | 85 (12%)                 | 57 (13%)                 |        |
|                                          | >80%               | 117 (10%)        | 91 (13%)                 | 26 (6%)                  |        |
| Delayed graft function                   |                    | 458 (40%)        | 289 (42%)                | 169 (38%)                | 0.168  |
| 1-year eGFR, ml/min/1.73m <sup>2</sup>   |                    | 48 [35, 63]      | 53 [40, 67]              | 43 [29, 53]              | <0.001 |
| 3-year eGFR, ml/min/1.73m <sup>2</sup>   |                    | 46 [30, 61]      | 51 [33, 66]              | 40 [24, 51]              | <0.001 |
| Kidney characteristics                   |                    | All (N=1729)     | Leuven Score ≤59 (N=874) | Leuven Score >59 (N=855) | P      |
| Glomerulosclerosis                       | GS < 10%           | 1307 (76%)       | 786 (90%)                | 521 (61%)                | <0.001 |
|                                          | GS 10%-20%         | 226 (13%)        | 53 (6%)                  | 173 (20%)                |        |
|                                          | GS >20%            | 196 (11%)        | 35 (4%)                  | 161 (19%)                |        |
| IFTA                                     | None (≤5%)         | 810 (47%)        | 577 (66%)                | 233 (27%)                | <0.001 |
|                                          | Mild (6-25%)       | 815 (47%)        | 291 (33%)                | 524 (61%)                |        |
|                                          | Moderate (26-50%)  | 99 (6%)          | 6 (1%)                   | 93 (11%)                 |        |
|                                          | Severe (>50%)      | 5 (0%)           |                          | 5 (1%)                   |        |
| Kidney discarded                         |                    | 585 (34%)        | 180 (21%)                | 405 (47%)                | <0.001 |
| KDRI                                     |                    | 1.57 [1.3, 1.91] | 1.34 [1.1, 1.57]         | 1.82 [1.56, 2.2]         | <0.001 |

Values are N (%) or median [interquartile range]. ESRD, end-stage renal disease; IFTA, interstitial fibrosis/tubular atrophy; eGFR, estimated glomerular filtration rate; KDRI, kidney donor risk index.
